# Supplementary material for: Elucidation of resistance signaling and identification of powdery mildew resistant mapping loci (ClaPMR2) during watermelon-Podosphaera xanthii interaction using RNA-Seq and whole-genome resequencing approach
Source: PubMed Central journal article supplement (PMC7441409; doi:10.1038/s41598-020-70932-z), 2020-08-20

Elucidation of Resistance Signaling and Identification of Powdery Mildew Resistant Mapping Loci (Cl<sub>a</sub>PMR2) during Watermelon-*Podosphaera xanthii* interaction using RNA-Seq and Whole-Genome Resequencing Approach.  
Mihir Kumar Mandal, Haktan Suren, Chandrasekar Kousik

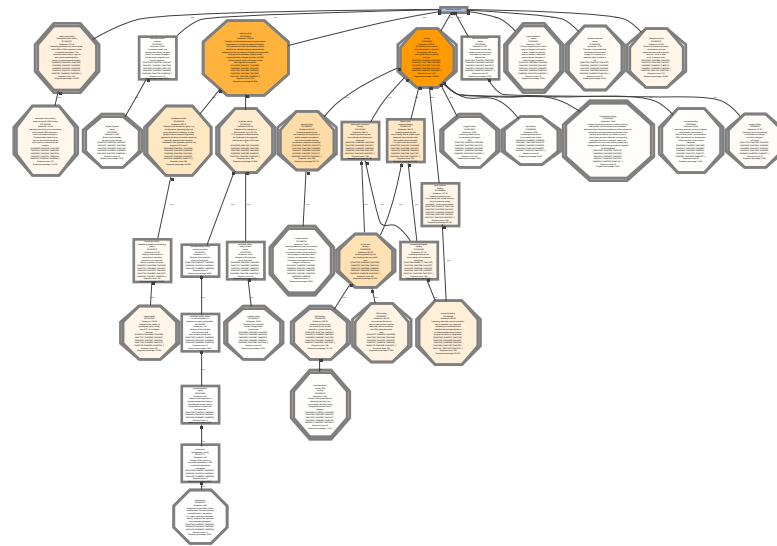

Supplement: 41598_2020_70932_MOESM6_ESM.pdf [file 41598_2020_70932_MOESM6_ESM.pdf]
